# Supplementary material for: Tailoring bromelain-loaded lipid–polymer hybrid nanoparticles for asthma management: fabrication and preclinical evaluation
Source: Royal Society of Chemistry journal article supplement (doi:10.1039/d4pm00327f), 2025-01-01
Supplement: d4pm00327f3.xlsx [file d4pm00327f3.xlsx]

## Sheet: Fig. 3A
	Bromelain (ng/ml)		Br-LPHNs (ng/ml)
Time (h)	Mean	SD	Mean	SD
0	0	0	0	0
0.5	2.35653	0.8	0.0986	0.05
1	3.39622	0.9	0.721041	0.49
2	4.02813	0.88	2.04159	0.56
4	2.36565	0.7	7.18458	0.51
6	1.08346	0.91	7.1561	0.77
8			6.83536	0.9
12			5.43335	0.7
24			1.61109	0.87

## Sheet: Fig. 3B
	Onset duration (s)		Convulsion period (s)		Recovery period (s)
Treatment	Mean	SD	Mean	SD	Mean	SD
Bromelain	67.8	5.75	70.98	8.4	90	12.3
chlorpheniramine	88.6	7.3	30.12	9.21	60.6	9.77
Br-LPHNs	157.5	13.1	0	0	30	6.87

## Sheet: Fig. 3C
	Protection (%)
Treatment	Mean	SD
Bromelain	40.83	10.7
chlorpheniramine	54.63	8.96
Br-LPHNs	74.45	8.76
