# Supplementary material for: Tailoring bromelain-loaded lipid–polymer hybrid nanoparticles for asthma management: fabrication and preclinical evaluation
Source: Royal Society of Chemistry journal article supplement (doi:10.1039/d4pm00327f), 2025-01-01
Supplement: d4pm00327f5.xlsx [file d4pm00327f5.xlsx]

## Sheet: LPO
			Lipid peroxides (nM/mg protein)
	Control		Bromelain		Std drug		Br-LPHNs
	mean	SD	mean	SD	mean	SD	mean	SD
Lung	389.52	17.8	193	24.65	108.47	9.43	93.27	8.84
Liver	344.19	21.8	182.32	11.47	151.95	8.43	85.62	7.84
Spleen	290.65	24.8	157.8	9.67	101.5	7.04	88.84	7.13
Trachea	298.93	16.8	198.3	18.97	164.62	8.63	100.45	9.03
BALF	372.86	14.77	199.57	21.34	101.65	13.75	25.54	8.2

## Sheet: MPO
			Myeloproxides
	Control		Bromelain		Std drug		Br-LPHNs
	mean	SD	mean	SD	mean	SD	mean	SD
Lung	396.77	22.62	146.46	26.15	121.53	37.74	57.84	8.53
Liver	341.54	16.12	158.77	12.52	117.5	21.7	47.69	27.67
Spleen	231.38	12.83	151.69	13.7	48	7.64	22.76	7.41
Trachea	200.92	13.88	128.92	12.38	60.92	21.38	39.07	17.03
BALF	382.31	14	225.38	10.7	107.6	15.2	38.46	8.7

## Sheet: Catalase
		Catalase level (%)
	Control		Bromelain		Std drug		Br-LPHNs
	mean	SD	mean	SD	mean	SD	mean	SD
Lung	5.81	3.88	32.68	7.03	39.21	8.05	80.29	8.76
Liver	9.36	5.69	32.64	8.81	45.66	7.04	79.78	7.92
Spleen	11.68	4.76	42.24	9.47	52.08	7.2	84.14	9.43
Trachea	7.12	4.43	33.33	9.6	48.21	5.25	81.17	7.67
BALF	8.2	5.4	21.2	9.97	65.47	7.66	83.9	7.31

## Sheet: GSH
			GSH level (%)
	Control		Bromelain		Std drug		Br-LPHNs
	mean	SD	mean	SD	mean	SD	mean	SD
Lung	8.87	3.99	30.49	2.15	41.82	2.66	78.03	3.95
Liver	8.45	3.03	35.57	3.1	38.41	1.47	75.35	8.26
Spleen	10.46	3.37	34.79	3.09	47.68	3.91	74.6	4.81
Trachea	8.4	2.37	31.49	2.16	50.3	4.97	79.96	6.08
BALF	5.43	2.78	33.68	2.49	52.43	3.43	83.91	5.2

## Sheet: Carbonylated protein
			Carbonylated protein (nM/mg)
	Control		Bromelain		Std drug		Br-LPHNs
	mean	SD	mean	SD	mean	SD	mean	SD
Lung	353.02	16.93	108.87	14.29	98.78	14.4	11.19	3.78
Liver	304.5	18.46	104.21	11.27	80.34	16.86	10.09	1.03
Spleen	244.16	27.52	96.68	10.29	77.04	16.78	8.87	2.9
Trachea	246.82	29.78	141.65	12.79	88.34	11.58	9.55	5.59

## Sheet: SOD
			SOD level (%)
	Control		Bromelain		Std drug		Br-LPHNs
	mean	SD	mean	SD	mean	SD	mean	SD
Lung	9.87	1.14	32.87	3.6	47.22	2.94	81.25	4.96
Liver	8.31	1.44	33.06	1.72	47.05	4.01	83.67	3.29
Spleen	12.88	2.13	39.07	3.59	53.08	2.38	89.09	5.14
Trachea	11.35	2.64	35.92	5.28	51.58	3.04	75.71	3.86
BALF	9.45	1.7	25.42	2.97	60.99	2.67	85.39	2.18

## Sheet: Eosinophile and BAL total cell 
	Eosinophile		L total cell count
	mean	SD	mean	SD
Control	2.25	0.09	270	22.3
Bromelain	0.77	0.08	167.5	12.3
Std Drug	0.62	0.12	145	14.6
Br-LPHNs	0.26	0.07	80	7.9
